# Supplementary material for: Noble Metal Complexes of a Bis-Caffeine Containing NHC Ligand
Source: MDPI journal article supplement (doi:10.3390/molecules27134316), 2022-07-05
Supplement: s1 [file s1]

## Supplementary Materials

# Noble Metal Complexes of a Bis-Caffeine Containing NHC Ligand

Oliver Bysewski <sup>1,2</sup>, Andreas Winter <sup>1,2</sup>, Phil Liebing <sup>3</sup> and Ulrich S. Schubert <sup>1,2,\*</sup>

<sup>[1]</sup> Laboratory of Organic and Macromolecular Chemistry (IOMC), Friedrich Schiller University Jena, Humboldtstrasse 10, 07743 Jena, Germany

<sup>[2]</sup> Center for Energy and Environmental Chemistry Jena (CEEC Jena), Philosophenweg 7a, 07743 Jena, Germany

<sup>[3]</sup> Institute for Inorganic and Analytical Chemistry (IAAC), Friedrich Schiller University Jena, Humboldtstr. 8, 07743 Jena, Germany

**KEYWORDS** caffeine, mesoionic carbene, palladium, platinum, NHC

## Contents

|                                                                                                                                                                                                                                                                         |    |
|-------------------------------------------------------------------------------------------------------------------------------------------------------------------------------------------------------------------------------------------------------------------------|----|
| Figure S1: ESI-MS spectrum of <b>3</b> .                                                                                                                                                                                                                                | 2  |
| Figure S2: ESI-MS spectrum of <b>4</b> .                                                                                                                                                                                                                                | 2  |
| Figure S3: ESI-MS spectrum of <b>5</b> .                                                                                                                                                                                                                                | 3  |
| Figure S4: ESI-MS spectrum of <b>6</b> .                                                                                                                                                                                                                                | 3  |
| Figure S5: ESI-MS spectrum of <b>7</b> .                                                                                                                                                                                                                                | 4  |
| Figure S6: $^1\text{H}$ -NMR (300 MHz, $\text{CDCl}_3$ ) spectrum of <b>3</b> . Asterisk show residual DMF.                                                                                                                                                             | 5  |
| Figure S7: $^{13}\text{C}$ -NMR (75 MHz, $\text{CDCl}_3$ ) spectrum of <b>3</b> .                                                                                                                                                                                       | 5  |
| Figure S8: $^1\text{H}$ -NMR (300 MHz, $\text{CH}_3\text{CN}$ ) spectrum of <b>4</b> .                                                                                                                                                                                  | 6  |
| Figure S9: $^{13}\text{C}$ -NMR (75 MHz, $\text{CH}_3\text{CN}$ ) spectrum of <b>4</b> .                                                                                                                                                                                | 6  |
| Figure S10: $^1\text{H}$ -NMR (300 MHz, $\text{CH}_3\text{CN}$ ) spectrum <b>5</b> .                                                                                                                                                                                    | 7  |
| Figure S11: $^{13}\text{C}$ -NMR (75 MHz, $\text{CH}_3\text{CN}$ ) spectrum <b>5</b> .                                                                                                                                                                                  | 7  |
| Figure S12: $^1\text{H}$ -NMR (300 MHz, $\text{CH}_3\text{CN}$ ) spectrum of <b>6</b> .                                                                                                                                                                                 | 8  |
| Figure S13: $^{13}\text{C}$ -NMR (75 MHz, $\text{CH}_3\text{CN}$ ) spectrum of <b>6</b> .                                                                                                                                                                               | 8  |
| Figure S14: $^1\text{H}$ -NMR (300 MHz, $\text{CH}_3\text{CN}$ ) spectrum of <b>7</b> . Asterisk show residual DMF.                                                                                                                                                     | 9  |
| Figure S15: $^{13}\text{C}$ -NMR (75 MHz, $\text{CH}_3\text{CN}$ ) spectrum of <b>7</b> .                                                                                                                                                                               | 9  |
| Figure S16: $^1\text{H}$ -NMR (300 MHz, $\text{CH}_3\text{CN}$ ) of the nickel complex.                                                                                                                                                                                 | 10 |
| Figure S17: $^1\text{H}$ -NMR (300 MHz, $\text{CH}_3\text{CN}$ ) of the ruthenium reaction.                                                                                                                                                                             | 10 |
| Figure S18: $^1\text{H}$ -NMR (300 MHz, $\text{CH}_3\text{CN}$ ) of the iron(II) NHC complex.                                                                                                                                                                           | 11 |
| Figure S19: Variable temperature $^1\text{H}$ -NMR (300 MHz, DMSO) of <b>6</b> from 25 °C (1) to 100 °C (8).                                                                                                                                                            | 11 |
| Figure S20: Variable temperature $^1\text{H}$ -NMR (300 MHz, DMSO) of <b>7</b> from 25 °C (1) to 100 °C (8).                                                                                                                                                            | 12 |
| Table S1: Crystal data and details on structure refinement for <b>7</b> · $\text{CH}_3\text{CN}$ .                                                                                                                                                                      | 13 |
| Table S2: Fractional Atomic Coordinates ( $\times 10^4$ ) and Equivalent Isotropic Displacement Parameters ( $\text{\AA}^2 \times 10^3$ ) for <b>7</b> · $\text{CH}_3\text{CN}$ . $U_{\text{eq}}$ is defined as 1/3 of the trace of the orthogonalised $U_{ij}$ tensor. | 14 |
| Table S3: Anisotropic Displacement Parameters ( $\text{\AA}^2 \times 10^3$ ) for <b>7</b> · $\text{CH}_3\text{CN}$ .                                                                                                                                                    | 15 |
| Table S4: Bond lengths for <b>7</b> · $\text{CH}_3\text{CN}$ .                                                                                                                                                                                                          | 16 |
| Table S5: Bond Angles for <b>7</b> · $\text{CH}_3\text{CN}$ .                                                                                                                                                                                                           | 17 |
| Table S6: Hydrogen Atom Coordinates ( $\text{\AA} \times 10^4$ ) and Isotropic Displacement Parameters ( $\text{\AA}^2 \times 10^3$ ) for <b>7</b> · $\text{CH}_3\text{CN}$ .                                                                                           | 18 |

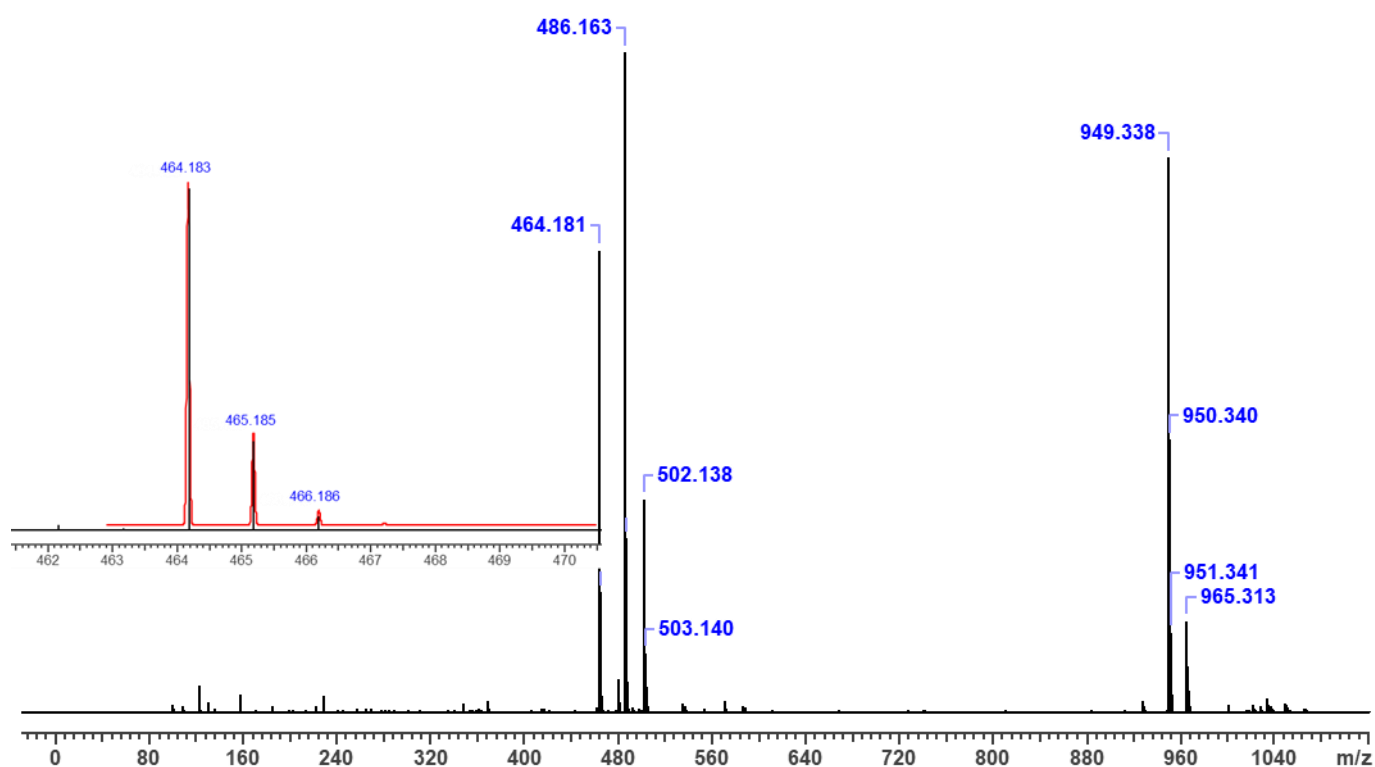

Figure S1: ESI-MS spectrum of **3**.

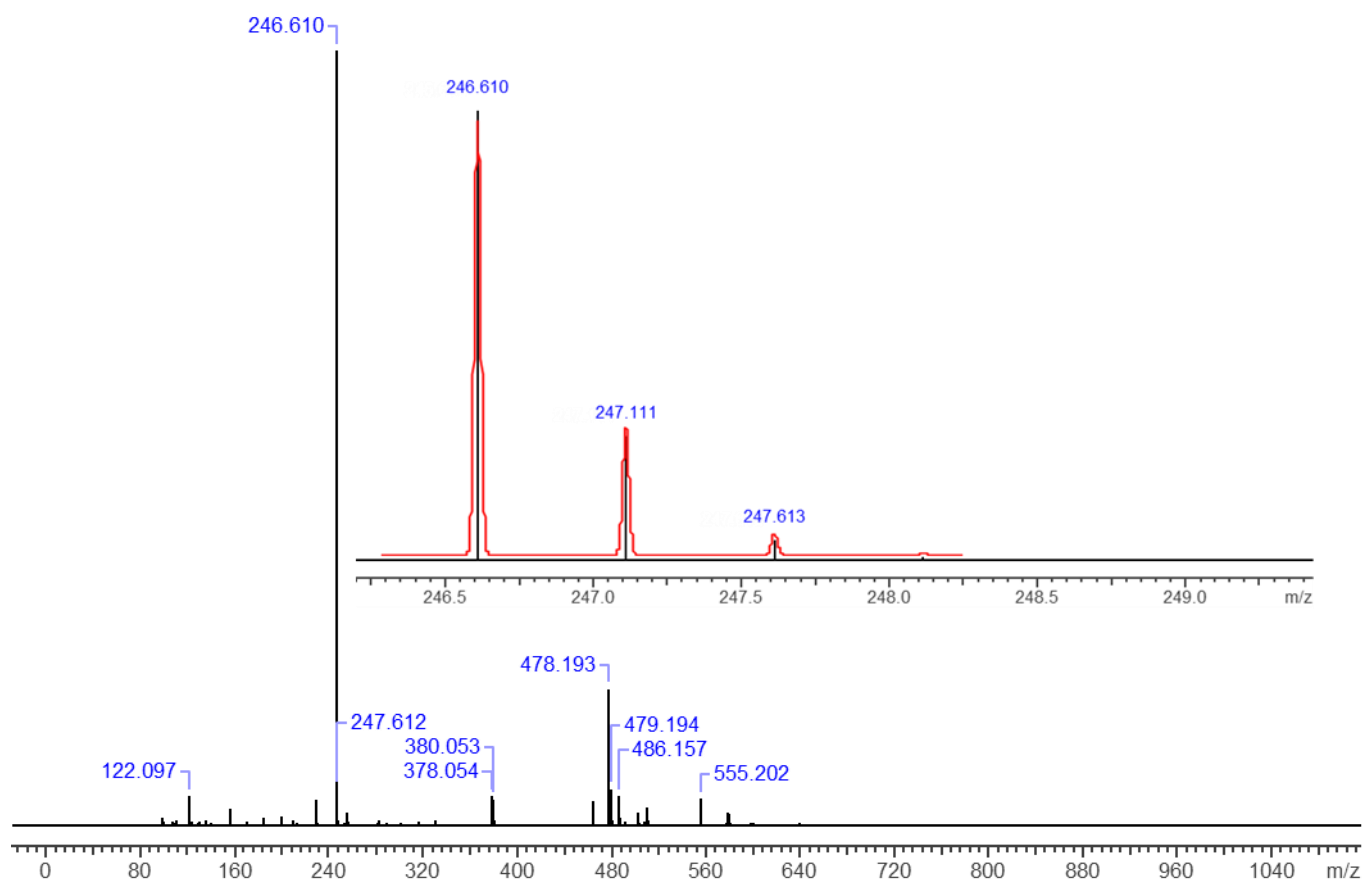

Figure S2: ESI-MS spectrum of **4**.

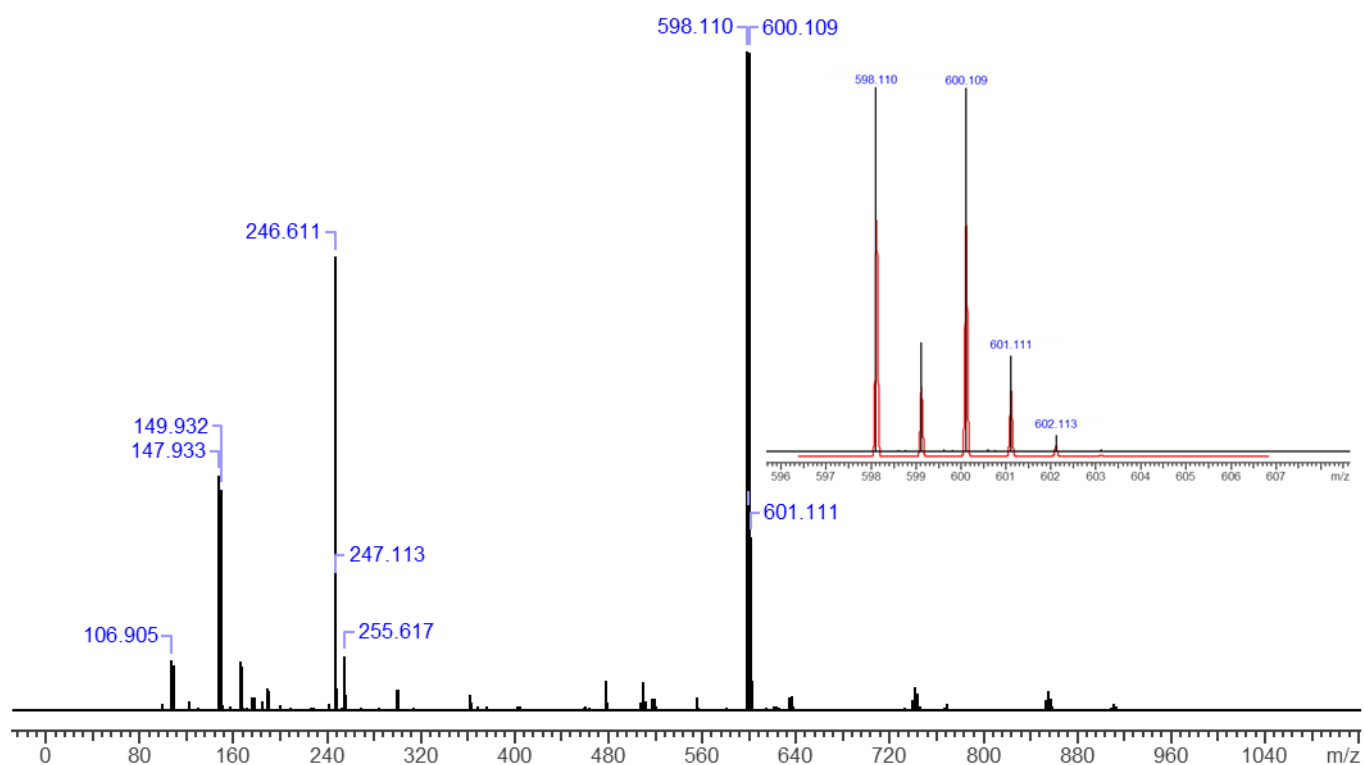

Figure S3: ESI-MS spectrum of **5**.

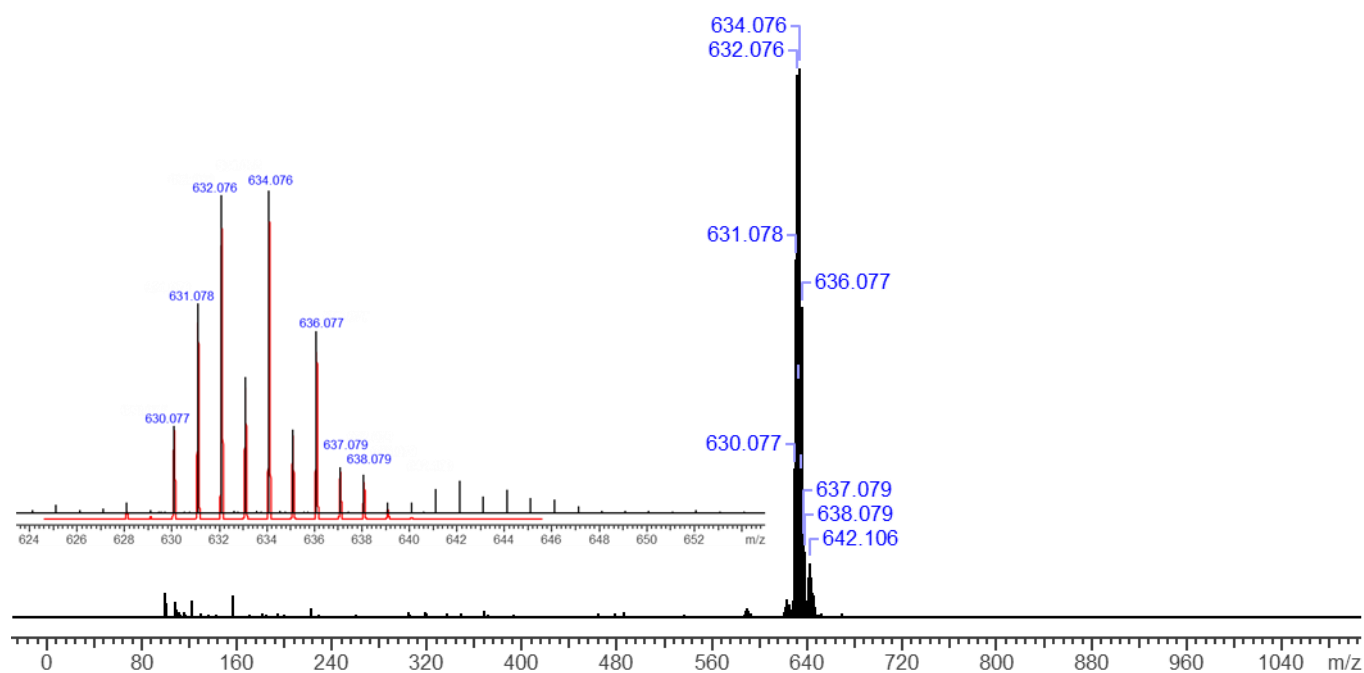

Figure S4: ESI-MS spectrum of **6**.

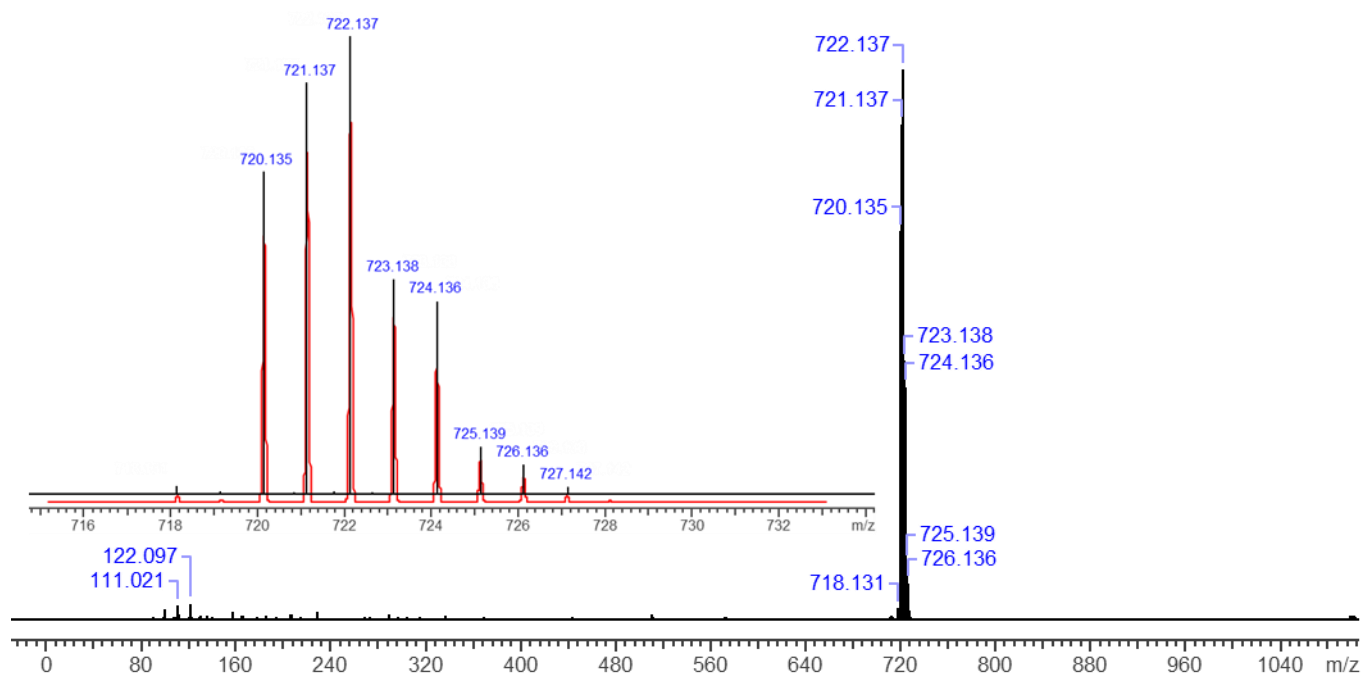

Figure S5: ESI-MS spectrum of **7**.

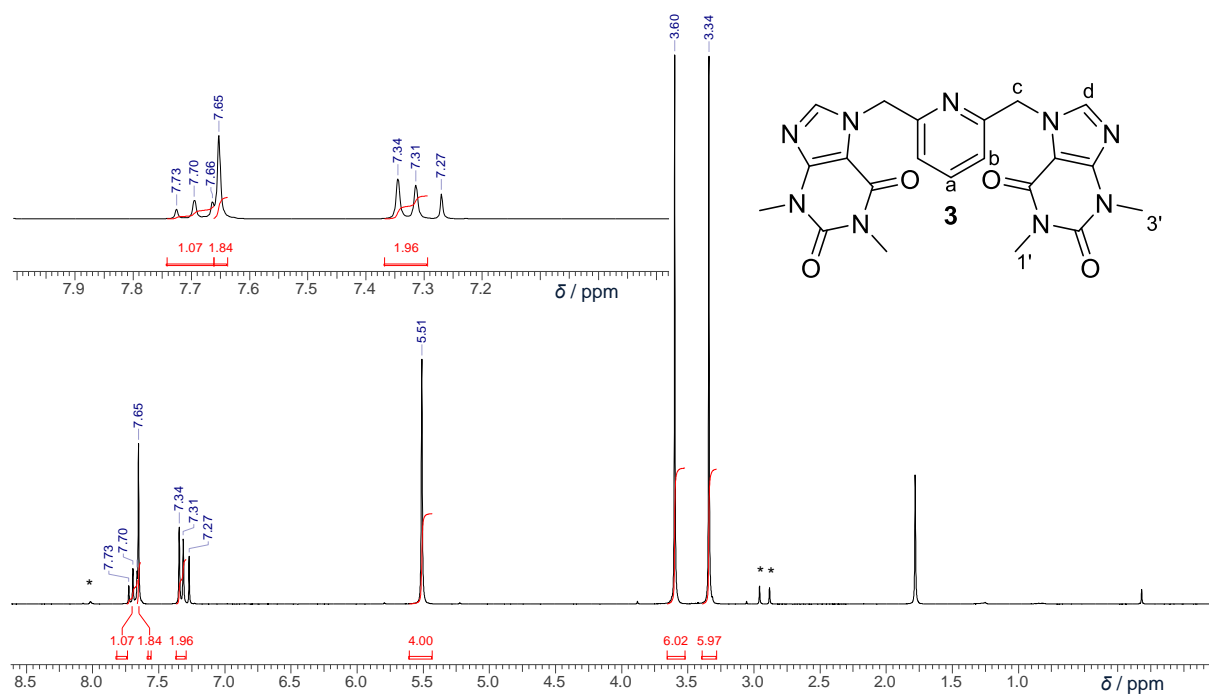

Figure S6: <sup>1</sup>H-NMR (300 MHz, CDCl<sub>3</sub>) spectrum of **3**. Asterisk show residual DMF.

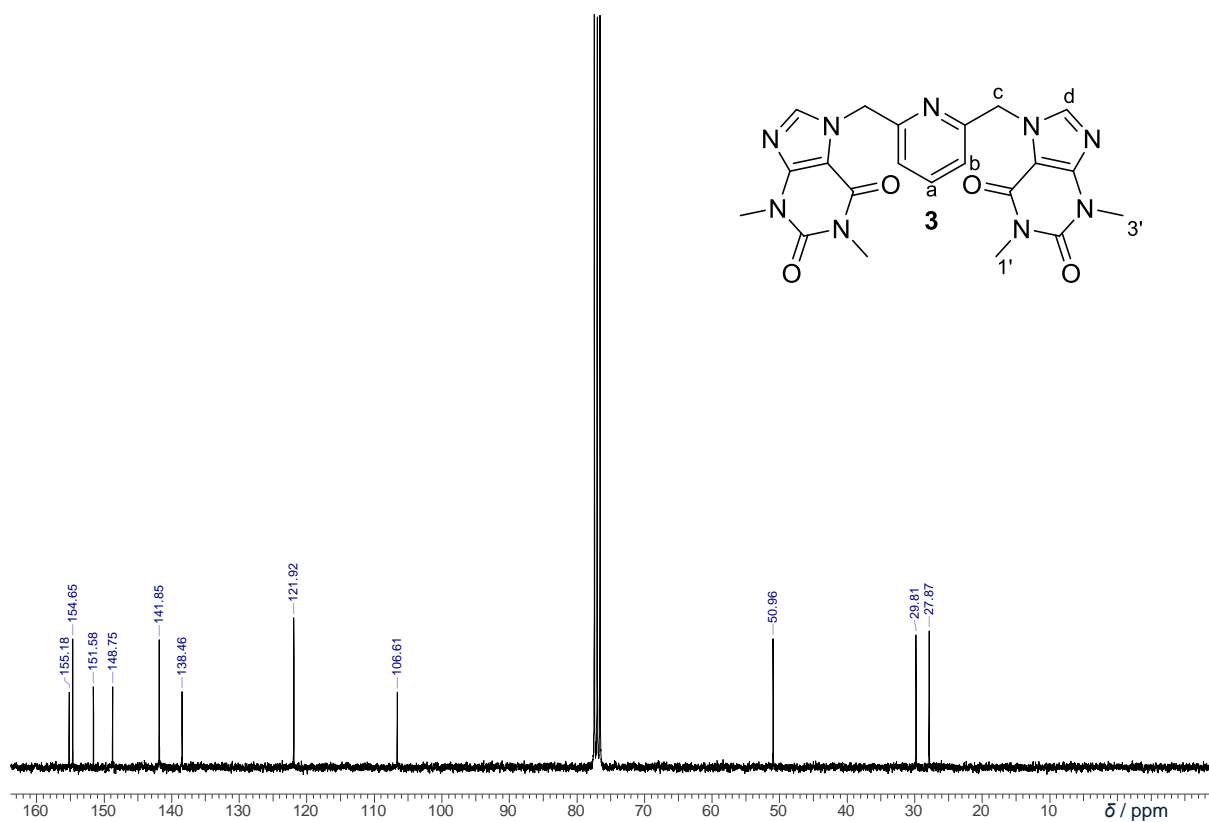

Figure S7: <sup>13</sup>C-NMR (75 MHz, CDCl<sub>3</sub>) spectrum of **3**.

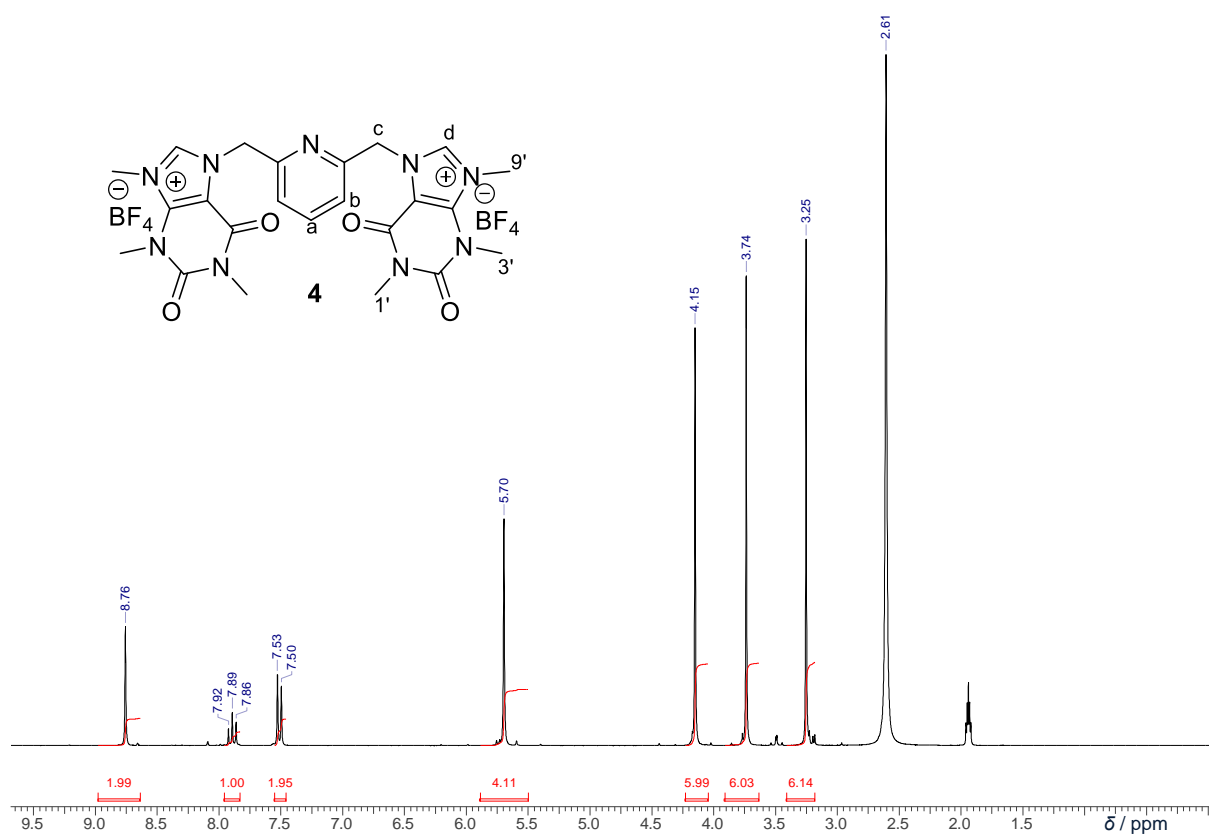

Figure S8:  $^1\text{H}$ -NMR (300 MHz,  $\text{CH}_3\text{CN}$ ) spectrum of **4**.

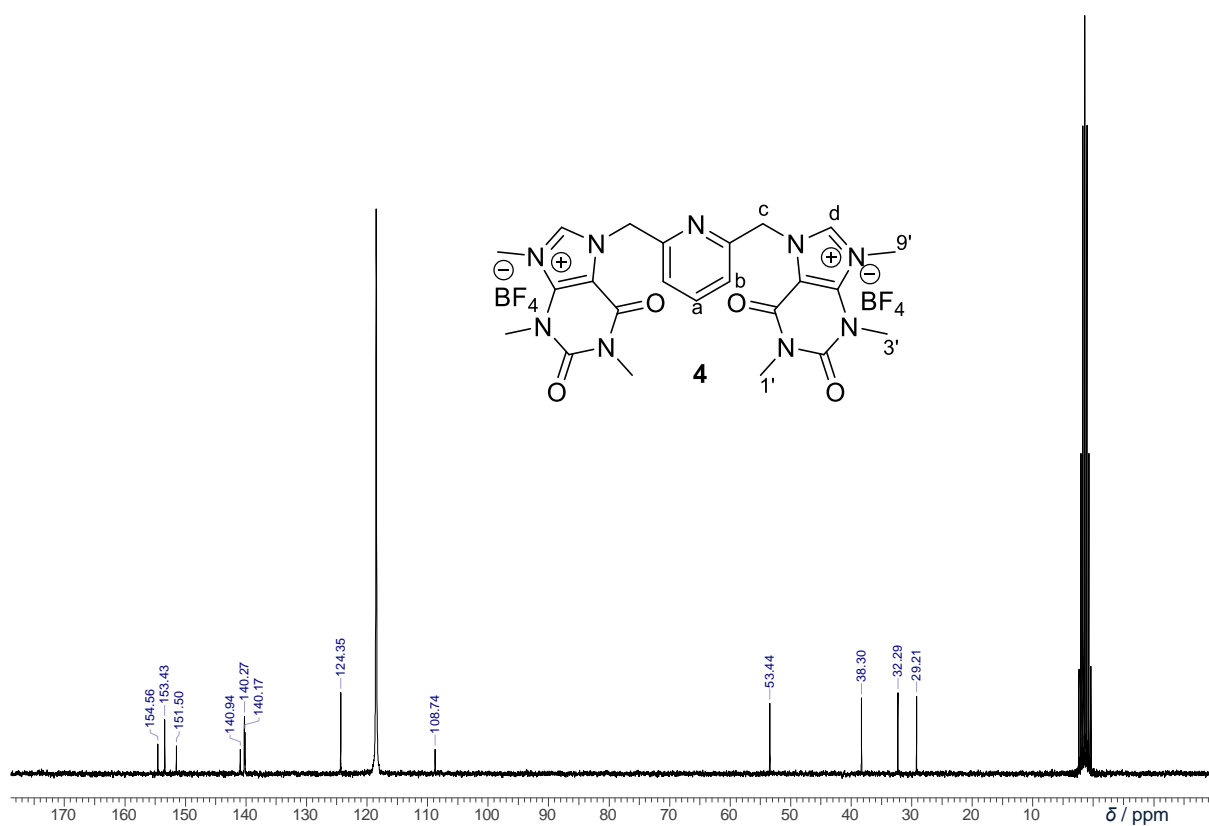

Figure S9:  $^{13}\text{C}$ -NMR (75 MHz,  $\text{CH}_3\text{CN}$ ) spectrum of **4**.

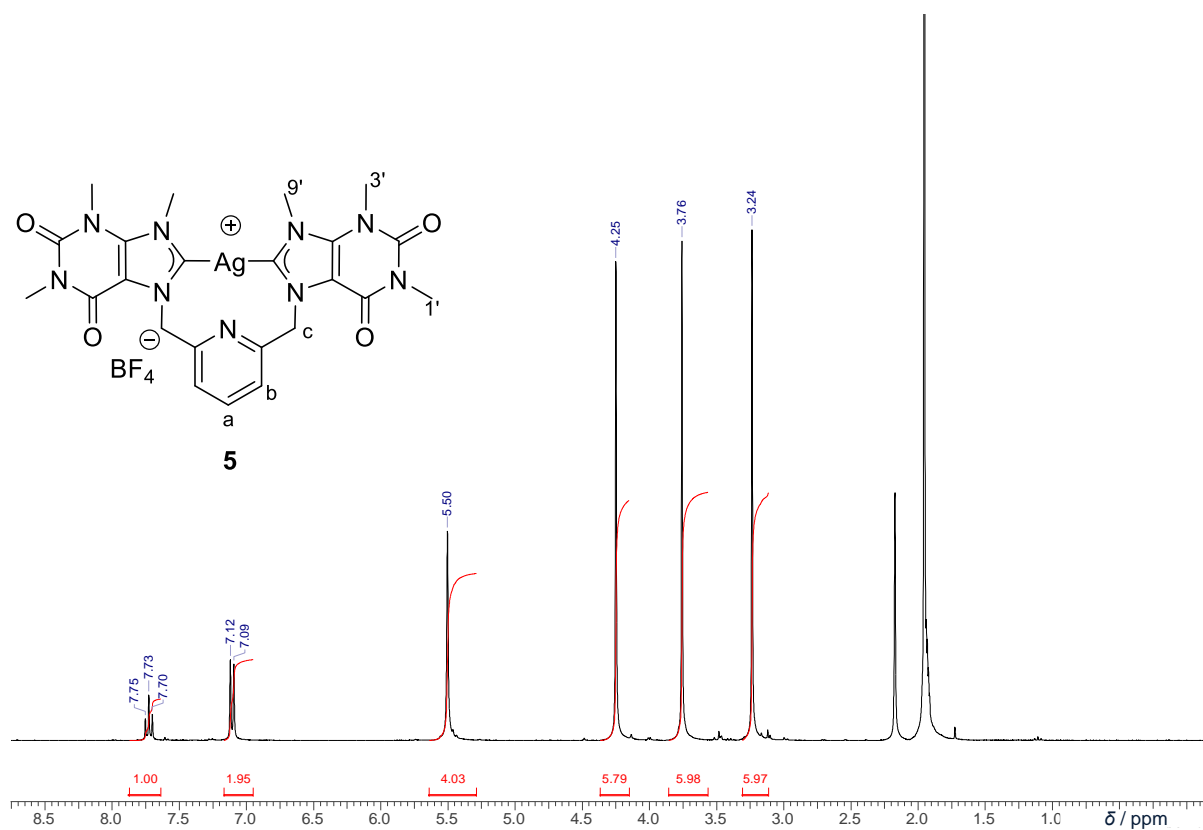

Figure S10: <sup>1</sup>H-NMR (300 MHz, CH<sub>3</sub>CN) spectrum **5**.

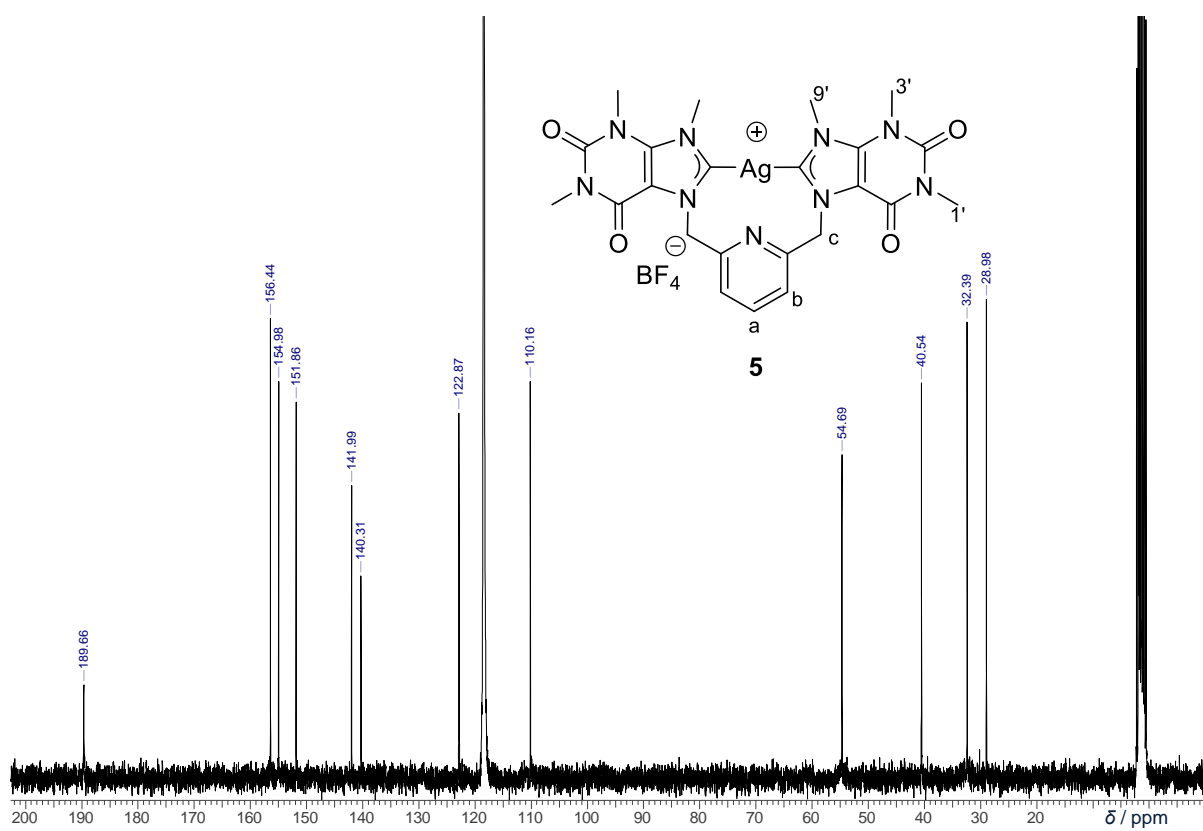

Figure S11: <sup>13</sup>C-NMR (75 MHz, CH<sub>3</sub>CN) spectrum **5**.



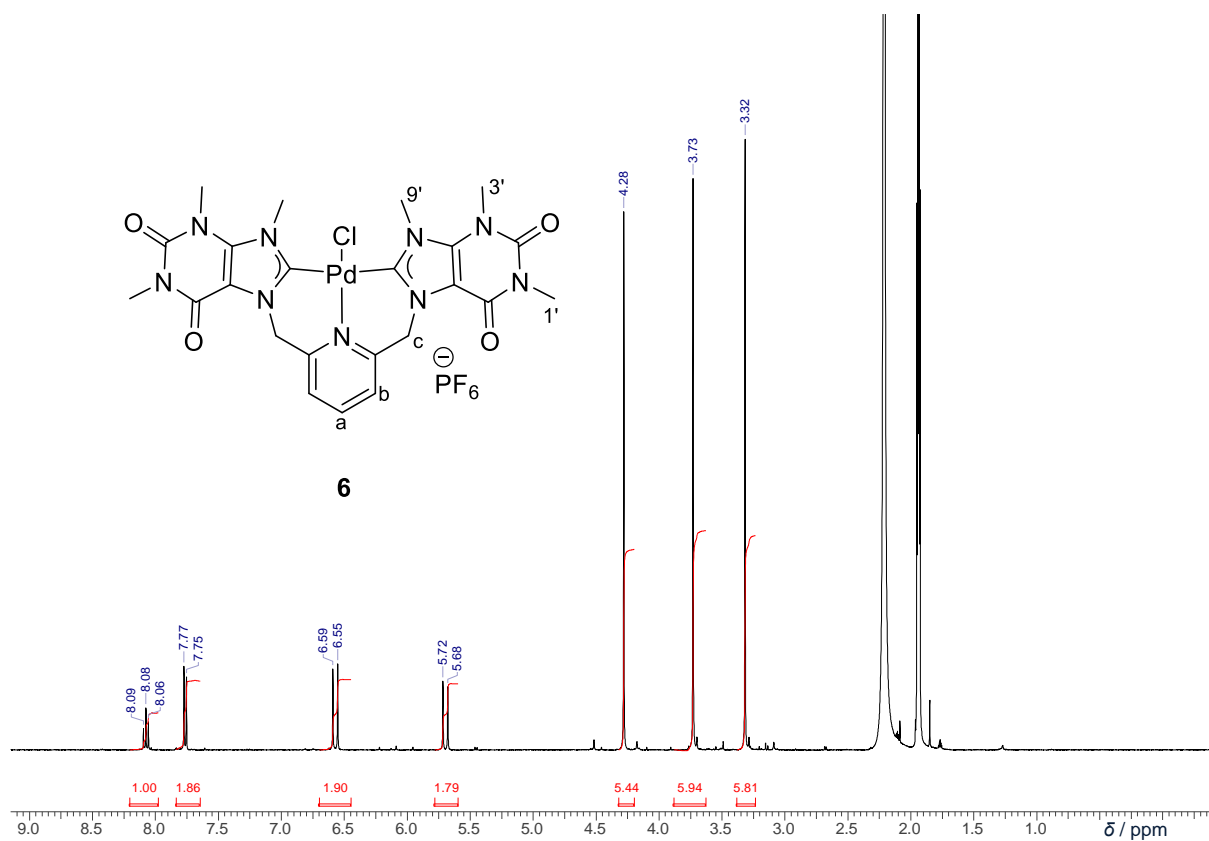

Figure S12: <sup>1</sup>H-NMR (300 MHz, CH<sub>3</sub>CN) spectrum of **6**.

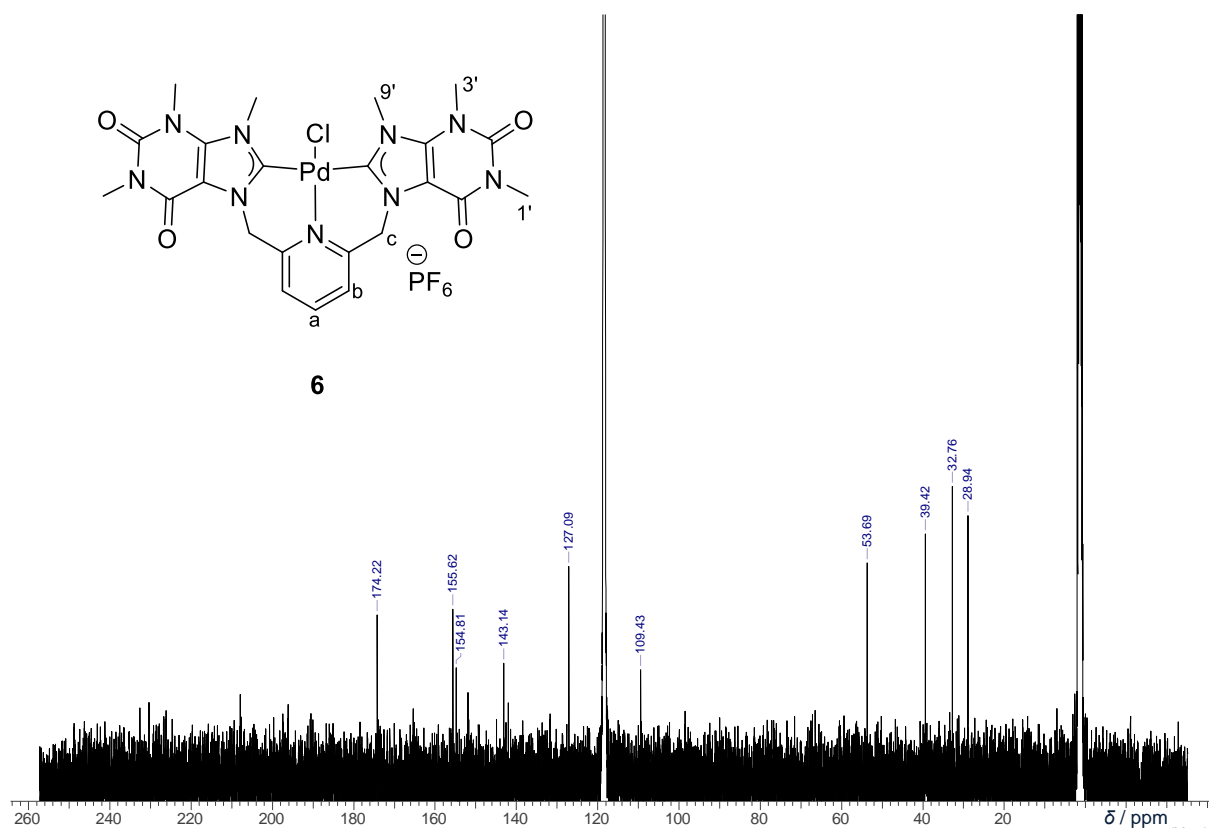

Figure S13: <sup>13</sup>C-NMR (75 MHz, CH<sub>3</sub>CN) spectrum of **6**.

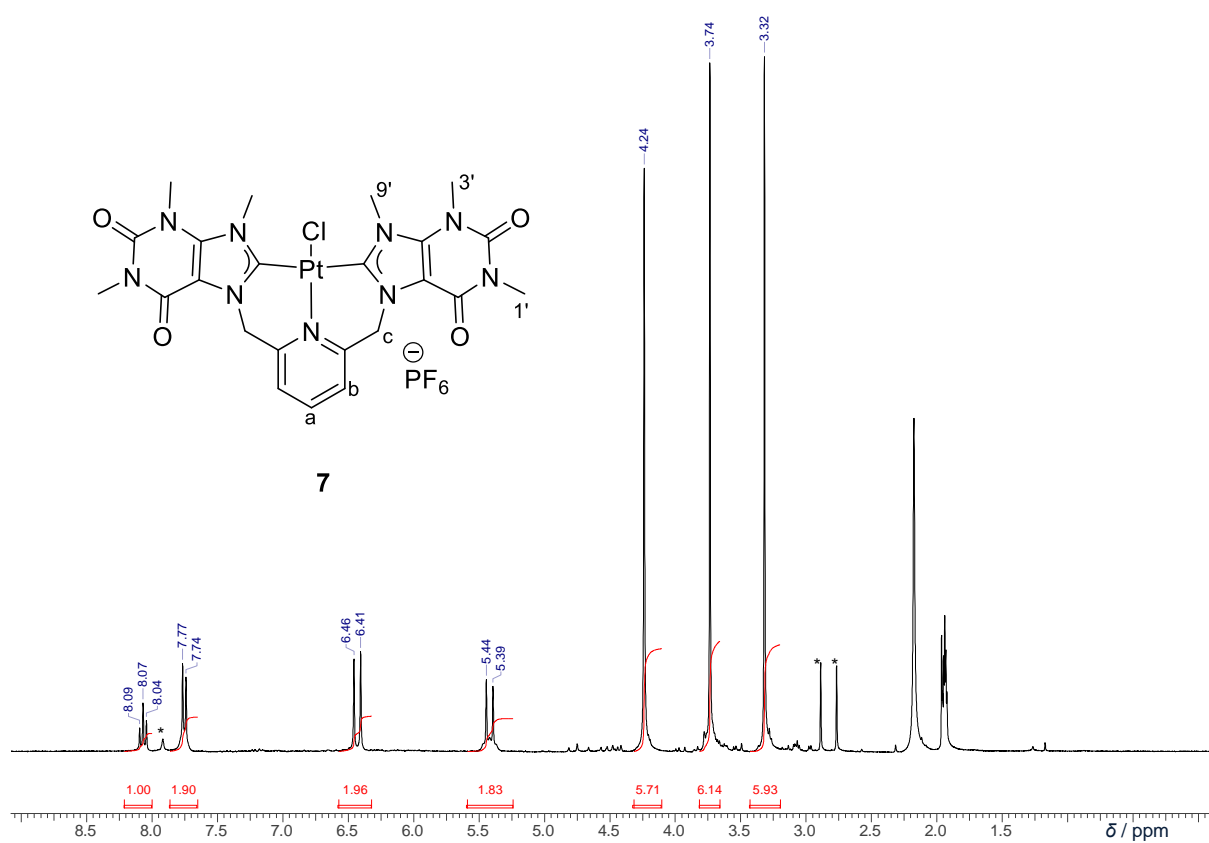

Figure S 14: <sup>1</sup>H-NMR (300 MHz, CH<sub>3</sub>CN) spectrum of **7**. Asterisk show residual DMF.

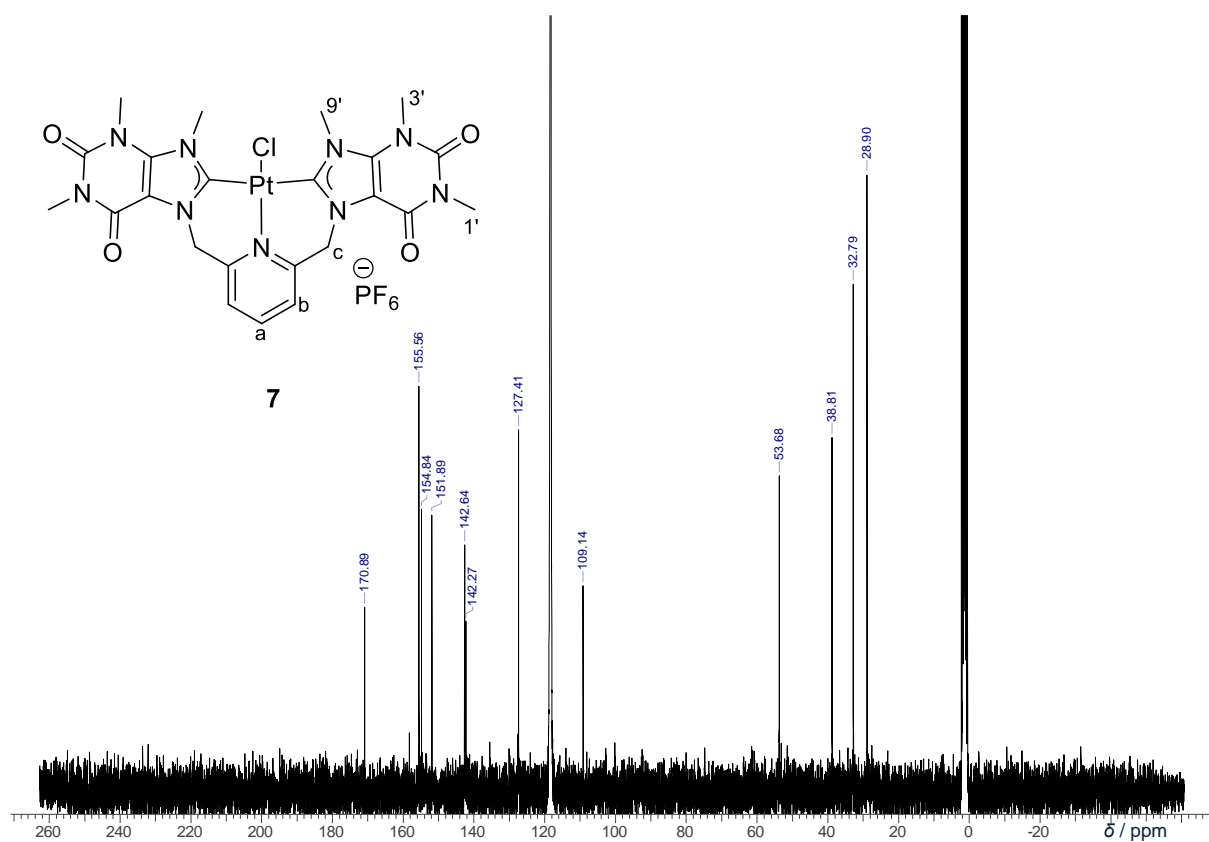

Figure S15: <sup>13</sup>C-NMR (75 MHz, CH<sub>3</sub>CN) spectrum of **7**.

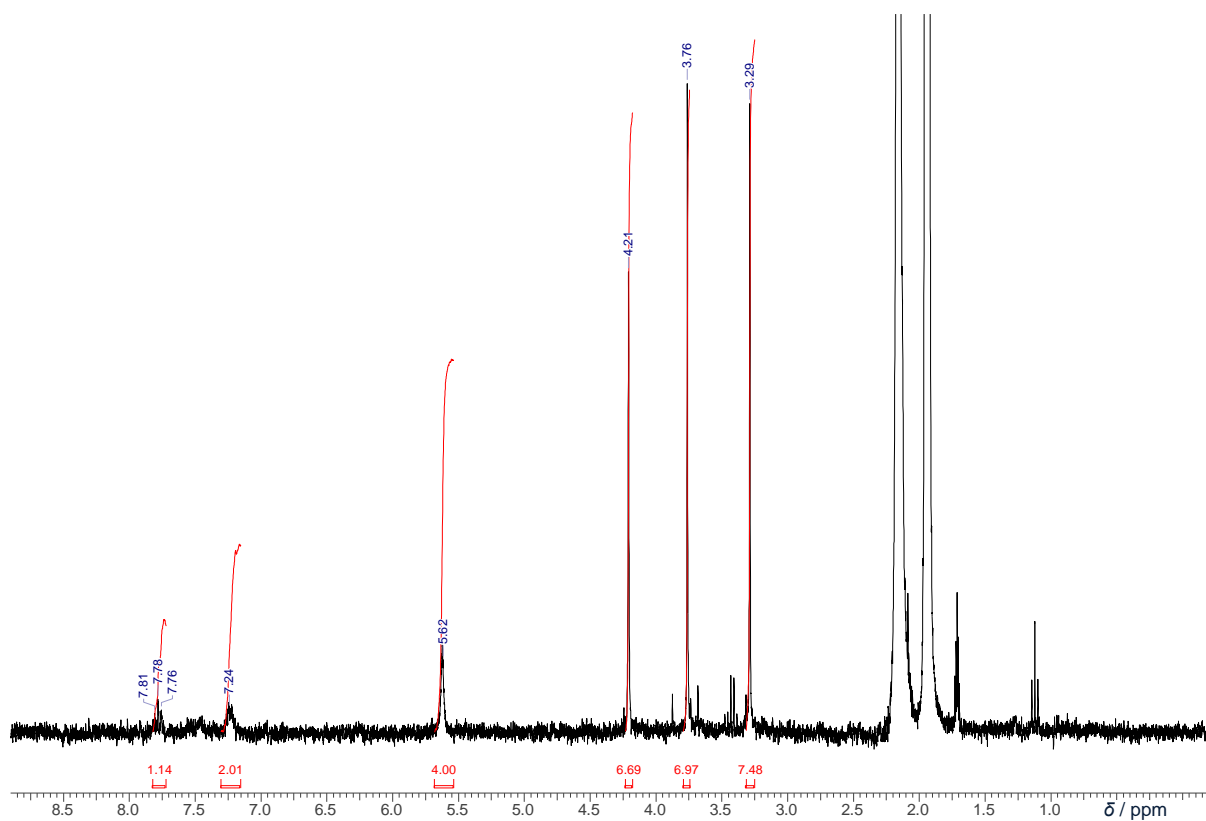

Figure S16: <sup>1</sup>H-NMR (300 MHz, CH<sub>3</sub>CN) of the nickel complex.

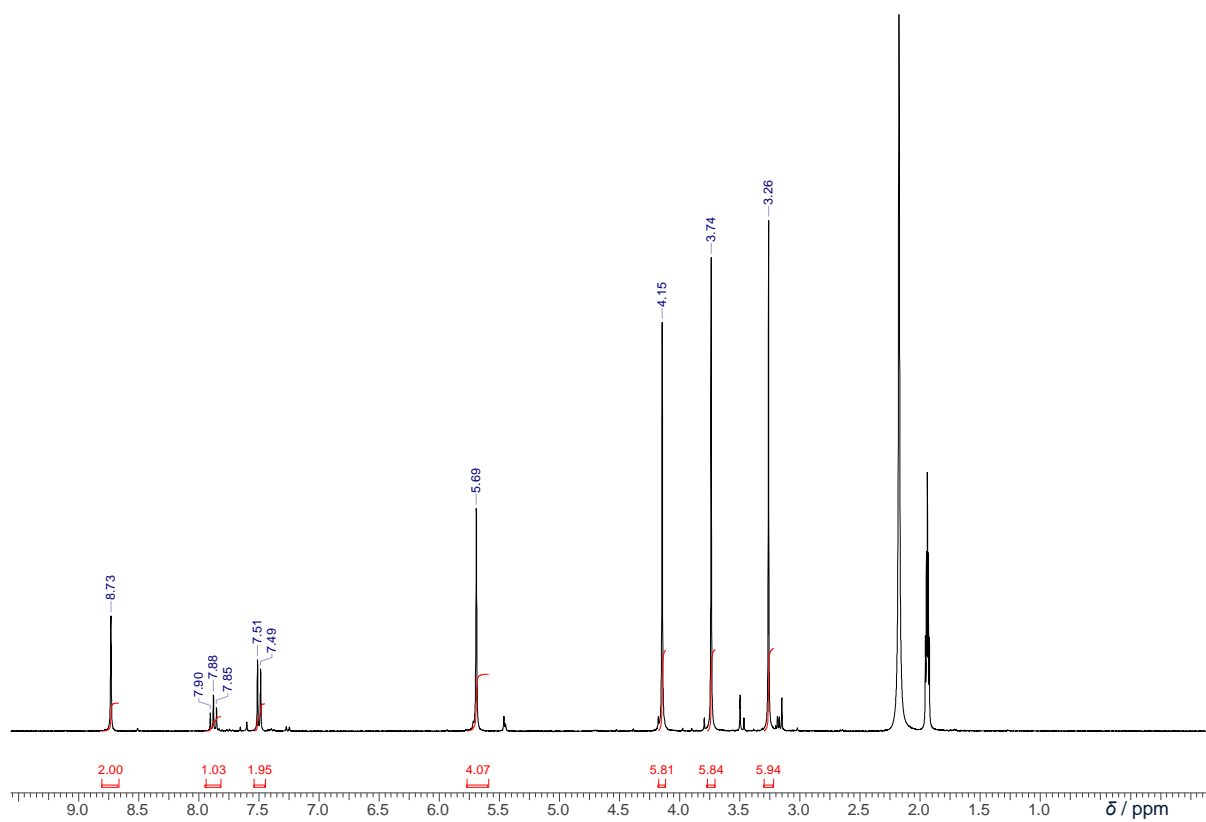

Figure S17: <sup>1</sup>H-NMR (300 MHz, CH<sub>3</sub>CN) of the ruthenium reaction.

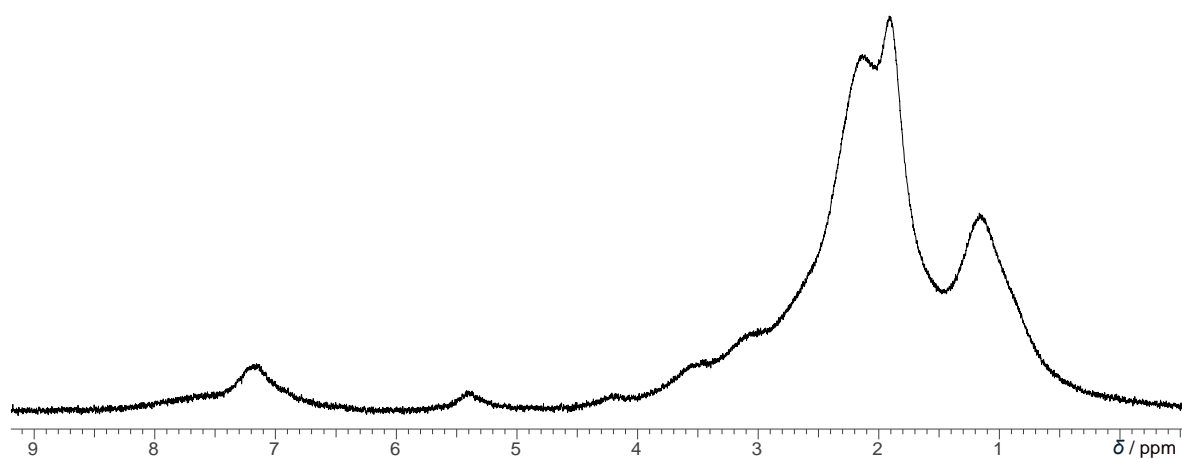

Figure S18:  $^1\text{H}$ -NMR (300 MHz,  $\text{CH}_3\text{CN}$ ) of the iron(II) NHC complex.

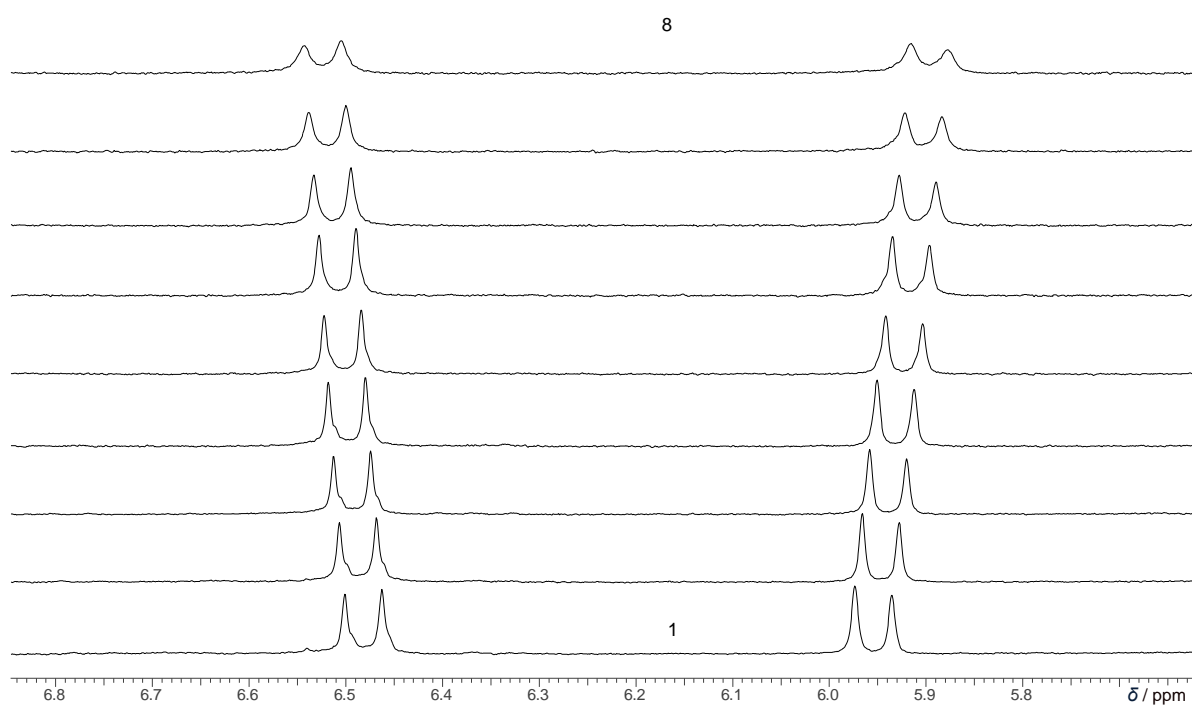

Figure S19: Variable temperature  $^1\text{H}$ -NMR (300 MHz, DMSO) of **6** from 25 °C (1) to 100 °C (8)

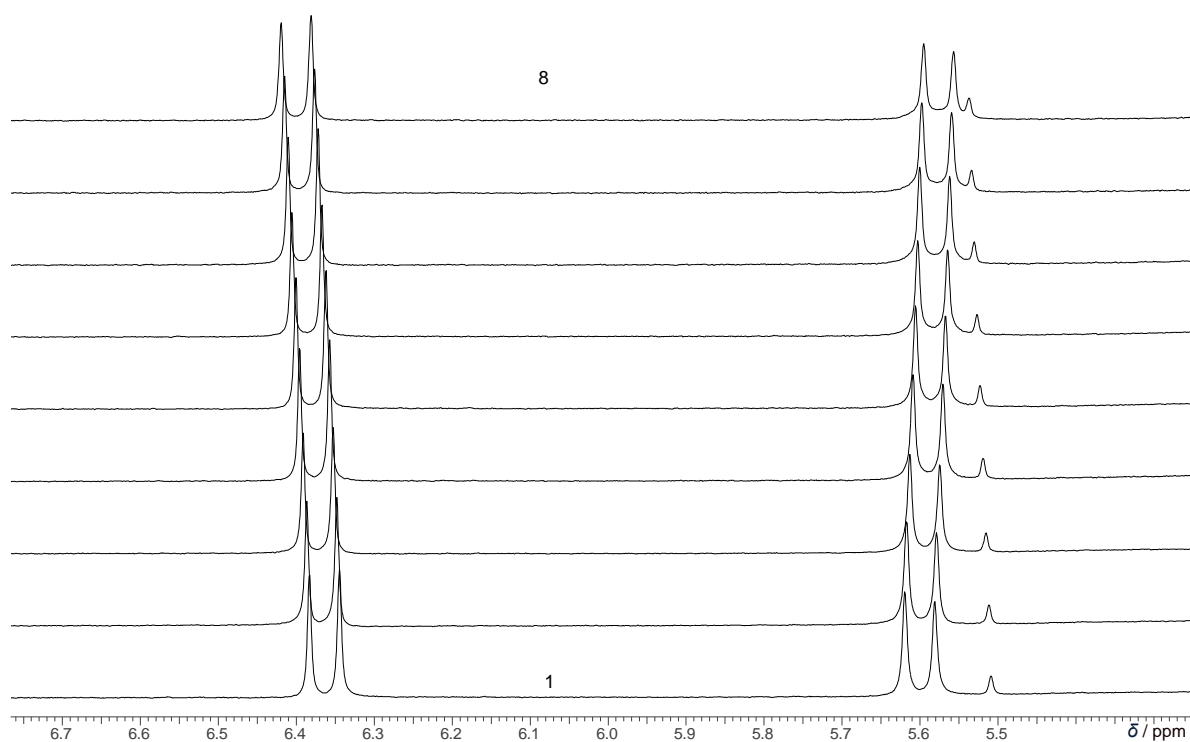

Figure S20: Variable temperature <sup>1</sup>H-NMR (300 MHz, DMSO) of **7** from 25 °C (1) to 100 °C (8)

Table S1: Crystal data and details on structure refinement for **7** · CH<sub>3</sub>CN.

|                                                              |                                                                                     |
|--------------------------------------------------------------|-------------------------------------------------------------------------------------|
| CSD deposition number                                        | 2157149                                                                             |
| Internal identification code                                 | bn00083                                                                             |
| Empirical formula                                            | C <sub>25</sub> H <sub>28</sub> ClF <sub>6</sub> N <sub>10</sub> O <sub>4</sub> PPt |
| Formula weight                                               | 908.08                                                                              |
| Temperature / K                                              | 120                                                                                 |
| Crystal system                                               | triclinic                                                                           |
| Space group                                                  | P $\bar{1}$                                                                         |
| <i>a</i> /Å                                                  | 10.430(1)                                                                           |
| <i>b</i> /Å                                                  | 12.026(1)                                                                           |
| <i>c</i> /Å                                                  | 13.200(1)                                                                           |
| $\alpha$ /°                                                  | 81.610(2)                                                                           |
| $\beta$ /°                                                   | 88.365(2)                                                                           |
| $\gamma$ /°                                                  | 69.819(2)                                                                           |
| Cell volume / Å <sup>3</sup>                                 | 1537.1(2)                                                                           |
| <i>Z</i>                                                     | 2                                                                                   |
| Calcd. density $\rho_{\text{calc}}$ / g/cm <sup>3</sup>      | 1.962                                                                               |
| Absorption coefficient $\mu$ / mm <sup>-1</sup>              | 4.792                                                                               |
| <i>F</i> (000)                                               | 888.0                                                                               |
| Crystal size / mm <sup>3</sup>                               | 0.29 × 0.21 × 0.17                                                                  |
| Crystal shape and color                                      | colorless prism                                                                     |
| Radiation                                                    | Mo-K $\alpha$ ( $\lambda$ = 0.71073)                                                |
| 2 $\theta$ range for data collection / °                     | 3.646 to 67.042                                                                     |
| Index ranges                                                 | −15 ≤ <i>h</i> ≤ 16, −16 ≤ <i>k</i> ≤ 18, −19 ≤ <i>l</i> ≤ 20                       |
| Reflections collected                                        | 26731                                                                               |
| Independent reflections                                      | 10968 [ <i>R</i> <sub>int</sub> = 0.0289, <i>R</i> <sub>sigma</sub> = 0.0353]       |
| Completeness of dataset                                      | 100%                                                                                |
| Data / restraints / parameters                               | 10968 / 0 / 440                                                                     |
| Goodness of fit on <i>F</i> <sup>2</sup>                     | 1.038                                                                               |
| Final <i>R</i> indexes [ <i>I</i> ≥ 2 $\sigma$ ( <i>I</i> )] | <i>R</i> <sub>1</sub> = 0.0236, w <i>R</i> <sub>2</sub> = 0.0509                    |
| Final <i>R</i> indexes [all data]                            | <i>R</i> <sub>1</sub> = 0.0279, w <i>R</i> <sub>2</sub> = 0.0524                    |
| Largest diff. peak and hole / e Å <sup>-3</sup>              | 2.29 and −2.30                                                                      |

Table S2: Fractional Atomic Coordinates ( $\times 10^4$ ) and Equivalent Isotropic Displacement Parameters ( $\text{\AA}^2 \times 10^3$ ) for **7** · CH<sub>3</sub>CN.  $U_{\text{eq}}$  is defined as 1/3 of the trace of the orthogonalised  $U_{ij}$  tensor.

| Atom | <i>x</i>   | <i>y</i>    | <i>z</i>    |
|------|------------|-------------|-------------|
| Pt1  | 4790.5(2)  | 3819.4(2)   | 2730.2(2)   |
| Cl1  | 6988.2(5)  | 3716.0(5)   | 2348.7(4)   |
| O1   | 7398.5(18) | -1550.6(14) | 7067.0(13)  |
| O2   | 3577.0(17) | 1795.7(15)  | 6833.3(12)  |
| O3   | 1446(2)    | 9681.1(16)  | -937.0(15)  |
| O4   | 471.7(17)  | 6217.7(15)  | -447.0(12)  |
| N1   | 2806.6(17) | 3960.2(14)  | 3063.2(12)  |
| N2   | 4634.2(17) | 2564.5(15)  | 4762.4(13)  |
| N3   | 6412.8(17) | 1376.1(15)  | 4095.5(13)  |
| N4   | 7081.2(18) | -261.8(15)  | 5576.1(14)  |
| N5   | 5465.7(19) | 84.7(16)    | 6917.1(13)  |
| N6   | 2928.1(18) | 5209.9(15)  | 1030.8(13)  |
| N7   | 4116.9(17) | 6294.6(16)  | 1351.2(13)  |
| N8   | 2823.9(19) | 8150.3(16)  | 188.6(14)   |
| N9   | 955.5(19)  | 7958.1(17)  | -680.5(14)  |
| C1   | 5392.3(19) | 2474.8(18)  | 3922.1(15)  |
| C2   | 3975(2)    | 5198.5(18)  | 1606.4(15)  |
| C3   | 3471(2)    | 3653.1(18)  | 4873.4(15)  |
| C4   | 2413(2)    | 3867.5(17)  | 4047.6(15)  |
| C5   | 1090(2)    | 3948.2(18)  | 4295.9(16)  |
| C6   | 135(2)     | 4140.7(19)  | 3526.2(17)  |
| C7   | 535(2)     | 4249.3(18)  | 2518.2(17)  |
| C8   | 1881(2)    | 4150.9(17)  | 2305.7(15)  |
| C9   | 2353(2)    | 4244.4(19)  | 1217.0(16)  |
| C10  | 6277(2)    | 816.6(18)   | 5059.2(15)  |
| C11  | 5139(2)    | 1545.3(18)  | 5474.4(15)  |
| C12  | 6701(2)    | -632.4(18)  | 6551.1(17)  |
| C13  | 4629(2)    | 1210.7(18)  | 6445.5(15)  |
| C14  | 7452(2)    | 910(2)      | 3342.8(17)  |
| C15  | 8463(2)    | -931(2)     | 5258(2)     |
| C16  | 5092(3)    | -397(2)     | 7926.2(17)  |
| C17  | 3115(2)    | 6987.7(18)  | 638.2(15)   |
| C18  | 2364(2)    | 6315.1(18)  | 432.8(15)   |
| C19  | 1721(2)    | 8661(2)     | -502.8(17)  |
| C20  | 1209(2)    | 6765.6(19)  | -253.3(15)  |
| C21  | 5063(2)    | 6663(2)     | 1915.8(18)  |
| C22  | 3527(3)    | 8934(2)     | 464(2)      |
| C23  | -182(2)    | 8500(2)     | -1433.4(19) |
| P1   | 1692.4(6)  | 7596.1(6)   | 3674.3(5)   |
| F1   | 3183.3(17) | 6701.5(15)  | 4044.9(13)  |
| F2   | 1811.2(17) | 6976.5(17)  | 2669.2(13)  |
| F3   | 1029(2)    | 6684.4(18)  | 4263.8(16)  |
| F4   | 1570.8(16) | 8218.4(15)  | 4682.8(12)  |
| F5   | 2371.4(18) | 8514.2(15)  | 3087.4(13)  |
| F6   | 213.3(16)  | 8512.2(18)  | 3301.7(14)  |
| N10  | 2946(2)    | 2013(2)     | -258.2(17)  |
| C24  | 2115(2)    | 2216(2)     | -868.1(18)  |
| C25  | 1055(3)    | 2463(2)     | -1649.6(19) |

Table S3: Anisotropic Displacement Parameters ( $\text{\AA}^2 \times 10^3$ ) for **7** · CH<sub>3</sub>CN.

| Atom | U <sub>11</sub> | U <sub>22</sub> | U <sub>33</sub> | U <sub>23</sub> | U <sub>13</sub> | U <sub>12</sub> |
|------|-----------------|-----------------|-----------------|-----------------|-----------------|-----------------|
| Pt1  | 13.50(3)        | 15.35(4)        | 12.34(3)        | 1.06(2)         | 0.30(2)         | -5.04(3)        |
| Cl1  | 15.6(2)         | 30.0(3)         | 26.7(3)         | 3.0(2)          | 4.11(19)        | -7.5(2)         |
| O1   | 29.1(8)         | 15.3(7)         | 25.1(8)         | 4.1(6)          | -5.6(7)         | -4.9(6)         |
| O2   | 23.1(8)         | 24.6(8)         | 19.3(7)         | 1.4(6)          | 4.8(6)          | -4.5(6)         |
| O3   | 38.1(10)        | 22.5(8)         | 36.5(10)        | 12.0(7)         | -11.9(8)        | -12.6(8)        |
| O4   | 22.8(7)         | 26.6(8)         | 18.7(7)         | 0.2(6)          | -4.5(6)         | -12.3(6)        |
| N1   | 14.2(7)         | 8.4(6)          | 12.5(7)         | 1.2(5)          | -1.3(6)         | -2.7(5)         |
| N2   | 14.9(7)         | 13.3(7)         | 14.0(7)         | 0.4(6)          | 0.3(6)          | -3.3(6)         |
| N3   | 12.6(7)         | 15.5(7)         | 14.6(7)         | -1.0(6)         | -0.5(6)         | -4.0(6)         |
| N4   | 16.9(8)         | 13.1(7)         | 17.6(8)         | 0.0(6)          | -1.9(6)         | -3.6(6)         |
| N5   | 21.8(8)         | 16.2(8)         | 14.8(8)         | 1.3(6)          | -2.5(6)         | -8.4(7)         |
| N6   | 18.5(8)         | 14.1(7)         | 11.9(7)         | 0.9(6)          | -1.3(6)         | -7.1(6)         |
| N7   | 15.7(7)         | 16.7(8)         | 14.5(7)         | 1.6(6)          | -0.6(6)         | -8.8(6)         |
| N8   | 22.9(9)         | 15.9(8)         | 19.5(8)         | 5.1(6)          | -2.8(7)         | -9.7(7)         |
| N9   | 19.1(8)         | 18.4(8)         | 16.3(8)         | 2.9(6)          | -2.4(6)         | -5.5(7)         |
| C1   | 13.6(8)         | 15.4(8)         | 12.8(8)         | -0.2(7)         | -1.6(6)         | -4.9(7)         |
| C2   | 16.2(8)         | 15.6(8)         | 12.4(8)         | 0.3(7)          | 0.2(7)          | -6.8(7)         |
| C3   | 16.7(8)         | 13.3(8)         | 13.7(8)         | -1.3(7)         | 1.4(7)          | -2.8(7)         |
| C4   | 15.6(8)         | 10.3(8)         | 15.3(8)         | -0.3(6)         | 0.9(7)          | -3.3(7)         |
| C5   | 17.9(9)         | 14.9(9)         | 17.7(9)         | -1.6(7)         | 3.3(7)          | -5.7(7)         |
| C6   | 15.9(9)         | 18.4(9)         | 24.9(10)        | -1.4(8)         | 1.6(8)          | -6.8(7)         |
| C7   | 16.9(9)         | 15.3(9)         | 21.1(10)        | -0.3(7)         | -3.0(7)         | -6.6(7)         |
| C8   | 17.7(8)         | 11.1(8)         | 16.9(9)         | 0.4(7)          | -0.8(7)         | -6.0(7)         |
| C9   | 22.1(9)         | 16.2(9)         | 15.2(9)         | -0.9(7)         | -1.6(7)         | -10.1(8)        |
| C10  | 14.7(8)         | 13.7(8)         | 14.9(8)         | 0.0(7)          | -2.1(7)         | -5.7(7)         |
| C11  | 14.6(8)         | 14.3(8)         | 14.4(8)         | -0.1(7)         | -1.1(7)         | -4.6(7)         |
| C12  | 20.3(9)         | 14.0(9)         | 19.9(9)         | -0.8(7)         | -3.9(7)         | -7.6(7)         |
| C13  | 19.4(9)         | 16.6(9)         | 14.2(8)         | 0.5(7)          | -2.1(7)         | -8.5(7)         |
| C14  | 18.1(9)         | 23.7(10)        | 18.5(9)         | -4.5(8)         | 5.1(7)          | -3.5(8)         |
| C15  | 18.7(10)        | 17.0(10)        | 32.9(12)        | 2.8(9)          | 2.3(9)          | 0.0(8)          |
| C16  | 32.3(12)        | 22.6(10)        | 14.7(9)         | 3.5(8)          | -1.3(8)         | -11.2(9)        |
| C17  | 16.5(8)         | 16.9(9)         | 13.4(8)         | 1.6(7)          | 0.1(7)          | -7.1(7)         |
| C18  | 19.0(9)         | 16.5(9)         | 11.5(8)         | 0.2(7)          | -0.4(7)         | -7.7(7)         |
| C19  | 23.7(10)        | 20.6(10)        | 19.1(10)        | 3.4(8)          | -1.9(8)         | -7.5(8)         |
| C20  | 17.9(9)         | 19.1(9)         | 11.8(8)         | -0.1(7)         | 0.7(7)          | -6.6(7)         |
| C21  | 23.1(10)        | 24.2(10)        | 22.4(10)        | 3.7(8)          | -6.8(8)         | -14.9(9)        |
| C22  | 33.1(13)        | 20.3(11)        | 40.9(14)        | 7.5(10)         | -               | -               |
| C23  | 22.3(10)        | 29.5(12)        | 25.7(11)        | 8.1(9)          | -8.9(9)         | -7.2(9)         |
| P1   | 19.0(2)         | 24.4(3)         | 23.6(3)         | -8.8(2)         | 4.3(2)          | -10.9(2)        |
| F1   | 27.9(8)         | 34.6(9)         | 40.1(9)         | 1.0(7)          | -0.3(7)         | -2.2(7)         |
| F2   | 30.2(8)         | 59.2(11)        | 40.0(9)         | -33.6(9)        | 10.6(7)         | -15.9(8)        |
| F3   | 60.3(12)        | 50.1(11)        | 62.1(12)        | -               | 32.4(10)        | -               |
| F4   | 33.5(8)         | 42.1(9)         | 29.0(8)         | -17.0(7)        | 0.7(6)          | -16.3(7)        |
| F5   | 44.9(10)        | 34.1(9)         | 39.1(9)         | 3.3(7)          | 6.0(7)          | -21.6(8)        |
| F6   | 22.8(7)         | 62.0(12)        | 41.5(10)        | -26.1(9)        | -5.1(7)         | 2.3(8)          |
| N10  | 29.2(10)        | 30.6(11)        | 29.5(11)        | -2.9(9)         | 1.6(8)          | -13.7(9)        |
| C24  | 24.0(10)        | 19.3(10)        | 23.7(10)        | -2.8(8)         | 6.0(8)          | -8.7(8)         |
| C25  | 25.2(11)        | 28.4(12)        | 23.9(11)        | -2.0(9)         | 0.8(9)          | -6.5(9)         |



Table S4: Bond lengths for **7** · CH<sub>3</sub>CN.

| Atom | Atom | Length/Å   | Atom | Atom | Length/Å   |
|------|------|------------|------|------|------------|
| Pt1  | C11  | 2.2976(6)  | N7   | C17  | 1.378(3)   |
| Pt1  | N1   | 2.0571(16) | N7   | C21  | 1.471(3)   |
| Pt1  | C1   | 2.024(2)   | N8   | C17  | 1.369(3)   |
| Pt1  | C2   | 2.014(2)   | N8   | C19  | 1.393(3)   |
| O1   | C12  | 1.211(3)   | N8   | C22  | 1.467(3)   |
| O2   | C13  | 1.226(3)   | N9   | C19  | 1.394(3)   |
| O3   | C19  | 1.215(3)   | N9   | C20  | 1.398(3)   |
| O4   | C20  | 1.225(3)   | N9   | C23  | 1.471(3)   |
| N1   | C4   | 1.352(2)   | C3   | C4   | 1.505(3)   |
| N1   | C8   | 1.349(3)   | C4   | C5   | 1.382(3)   |
| N2   | C1   | 1.339(2)   | C5   | C6   | 1.381(3)   |
| N2   | C3   | 1.469(3)   | C6   | C7   | 1.385(3)   |
| N2   | C11  | 1.382(3)   | C7   | C8   | 1.391(3)   |
| N3   | C1   | 1.374(3)   | C8   | C9   | 1.507(3)   |
| N3   | C10  | 1.377(3)   | C10  | C11  | 1.364(3)   |
| N3   | C14  | 1.469(3)   | C11  | C13  | 1.431(3)   |
| N4   | C10  | 1.369(3)   | C17  | C18  | 1.362(3)   |
| N4   | C12  | 1.392(3)   | C18  | C20  | 1.426(3)   |
| N4   | C15  | 1.472(3)   | P1   | F1   | 1.5970(17) |
| N5   | C12  | 1.399(3)   | P1   | F2   | 1.5957(16) |
| N5   | C13  | 1.397(3)   | P1   | F3   | 1.5910(18) |
| N5   | C16  | 1.470(3)   | P1   | F4   | 1.6012(15) |
| N6   | C2   | 1.343(3)   | P1   | F5   | 1.6060(17) |
| N6   | C9   | 1.468(3)   | P1   | F6   | 1.5963(18) |
| N6   | C18  | 1.384(3)   | N10  | C24  | 1.139(3)   |
| N7   | C2   | 1.369(3)   | C24  | C25  | 1.457(3)   |

Table S5: Bond Angles for **7** · CH<sub>3</sub>CN.

| Atom | Atom | Atom | Angle/°    | Atom | Atom | Atom |
|------|------|------|------------|------|------|------|
| N1   | Pt1  | C11  | 178.50(5)  | C6   | C7   | C8   |
| C1   | Pt1  | C11  | 93.38(6)   | N1   | C8   | C7   |
| C1   | Pt1  | N1   | 87.80(7)   | N1   | C8   | C9   |
| C2   | Pt1  | C11  | 92.99(6)   | C7   | C8   | C9   |
| C2   | Pt1  | N1   | 85.82(7)   | N6   | C9   | C8   |
| C2   | Pt1  | C1   | 173.46(8)  | N4   | C10  | N3   |
| C4   | N1   | Pt1  | 120.24(13) | C11  | C10  | N3   |
| C8   | N1   | Pt1  | 120.64(13) | C11  | C10  | N4   |
| C8   | N1   | C4   | 119.12(17) | N2   | C11  | C13  |
| C1   | N2   | C3   | 121.68(17) | C10  | C11  | N2   |
| C1   | N2   | C11  | 110.88(16) | C10  | C11  | C13  |
| C11  | N2   | C3   | 127.39(16) | O1   | C12  | N4   |
| C1   | N3   | C10  | 109.02(16) | O1   | C12  | N5   |
| C1   | N3   | C14  | 123.62(17) | N4   | C12  | N5   |
| C10  | N3   | C14  | 127.35(17) | O2   | C13  | N5   |
| C10  | N4   | C12  | 118.40(17) | O2   | C13  | C11  |
| C10  | N4   | C15  | 123.29(18) | N5   | C13  | C11  |
| C12  | N4   | C15  | 117.05(18) | N8   | C17  | N7   |
| C12  | N5   | C16  | 114.73(18) | C18  | C17  | N7   |
| C13  | N5   | C12  | 126.32(18) | C18  | C17  | N8   |
| C13  | N5   | C16  | 118.85(18) | N6   | C18  | C20  |
| C2   | N6   | C9   | 121.18(17) | C17  | C18  | N6   |
| C2   | N6   | C18  | 110.31(17) | C17  | C18  | C20  |
| C18  | N6   | C9   | 127.34(17) | O3   | C19  | N8   |
| C2   | N7   | C17  | 108.94(16) | O3   | C19  | N9   |
| C2   | N7   | C21  | 121.95(17) | N8   | C19  | N9   |
| C17  | N7   | C21  | 128.33(18) | O4   | C20  | N9   |
| C17  | N8   | C19  | 118.79(18) | O4   | C20  | C18  |
| C17  | N8   | C22  | 123.61(19) | N9   | C20  | C18  |
| C19  | N8   | C22  | 117.34(18) | F1   | P1   | F4   |
| C19  | N9   | C20  | 126.24(18) | F1   | P1   | F5   |
| C19  | N9   | C23  | 116.88(19) | F2   | P1   | F1   |
| C20  | N9   | C23  | 116.78(18) | F2   | P1   | F4   |
| N2   | C1   | Pt1  | 118.33(14) | F2   | P1   | F5   |
| N2   | C1   | N3   | 106.17(17) | F2   | P1   | F6   |
| N3   | C1   | Pt1  | 135.39(14) | F3   | P1   | F1   |
| N6   | C2   | Pt1  | 119.40(14) | F3   | P1   | F2   |
| N6   | C2   | N7   | 106.53(17) | F3   | P1   | F4   |
| N7   | C2   | Pt1  | 133.34(15) | F3   | P1   | F5   |
| N2   | C3   | C4   | 109.59(16) | F3   | P1   | F6   |
| N1   | C4   | C3   | 117.74(17) | F4   | P1   | F5   |
| N1   | C4   | C5   | 121.59(19) | F6   | P1   | F1   |
| C5   | C4   | C3   | 120.66(18) | F6   | P1   | F4   |
| C6   | C5   | C4   | 119.76(19) | F6   | P1   | F5   |
| C5   | C6   | C7   | 118.60(19) | N10  | C24  | C25  |

Table S6: Hydrogen Atom Coordinates ( $\text{\AA} \times 10^4$ ) and Isotropic Displacement Parameters ( $\text{\AA}^2 \times 10^3$ ) for  $7 \cdot \text{CH}_3\text{CN}$ .

| Atom | <i>x</i> | <i>y</i> | <i>z</i> | U(eq) |
|------|----------|----------|----------|-------|
| H3A  | 3786.44  | 4346.99  | 4820.38  | 18    |
| H3B  | 3067.66  | 3561.99  | 5554.87  | 18    |
| H5   | 839.05   | 3871.63  | 4993.22  | 20    |
| H6   | -777.62  | 4197.33  | 3685.22  | 24    |
| H7   | -104.84  | 4390.12  | 1974.99  | 21    |
| H9A  | 3055.17  | 3476.72  | 1101.23  | 20    |
| H9B  | 1573.69  | 4416.76  | 737.28   | 20    |
| H14A | 7178.3   | 1403.96  | 2673.08  | 32    |
| H14B | 7539.21  | 82.05    | 3291.34  | 32    |
| H14C | 8331.6   | 931.75   | 3562     | 32    |
| H15A | 8397.8   | -1359.1  | 4694.57  | 38    |
| H15B | 8967     | -1507.79 | 5837.87  | 38    |
| H15C | 8944.6   | -372.37  | 5028.12  | 38    |
| H16A | 5829.76  | -540.39  | 8425.56  | 35    |
| H16B | 4947.45  | -1151.15 | 7881.12  | 35    |
| H16C | 4249.61  | 181.05   | 8144.54  | 35    |
| H21A | 4538.64  | 7306.79  | 2299.39  | 33    |
| H21B | 5647.76  | 6950.98  | 1431.05  | 33    |
| H21C | 5631.12  | 5978.13  | 2393.13  | 33    |
| H22A | 3393.14  | 9019.81  | 1190.29  | 46    |
| H22B | 3152.51  | 9723.16  | 46.33    | 46    |
| H22C | 4505.82  | 8584.04  | 339.31   | 46    |
| H23A | 96.57    | 8198.61  | -2085.49 | 41    |
| H23B | -425.86  | 9372.32  | -1535.96 | 41    |
| H23C | -972.73  | 8289.27  | -1180.45 | 41    |
| H25A | 1457.65  | 2482.89  | -2329.12 | 40    |
| H25B | 347.38   | 3239.41  | -1599.64 | 40    |
| H25C | 647.78   | 1833.94  | -1545.9  | 40    |
